# Supplementary material for: Whole-Genome Restriction Mapping by “Subhaploid”-Based RAD Sequencing: An Efficient and Flexible Approach for Physical Mapping and Genome Scaffolding
Source: Oxford University Press journal article supplement (doi:10.1534/genetics.117.200303), 2017-05-04
Supplement: files2.pdf [file files2.pdf]

## Supplementary Materials

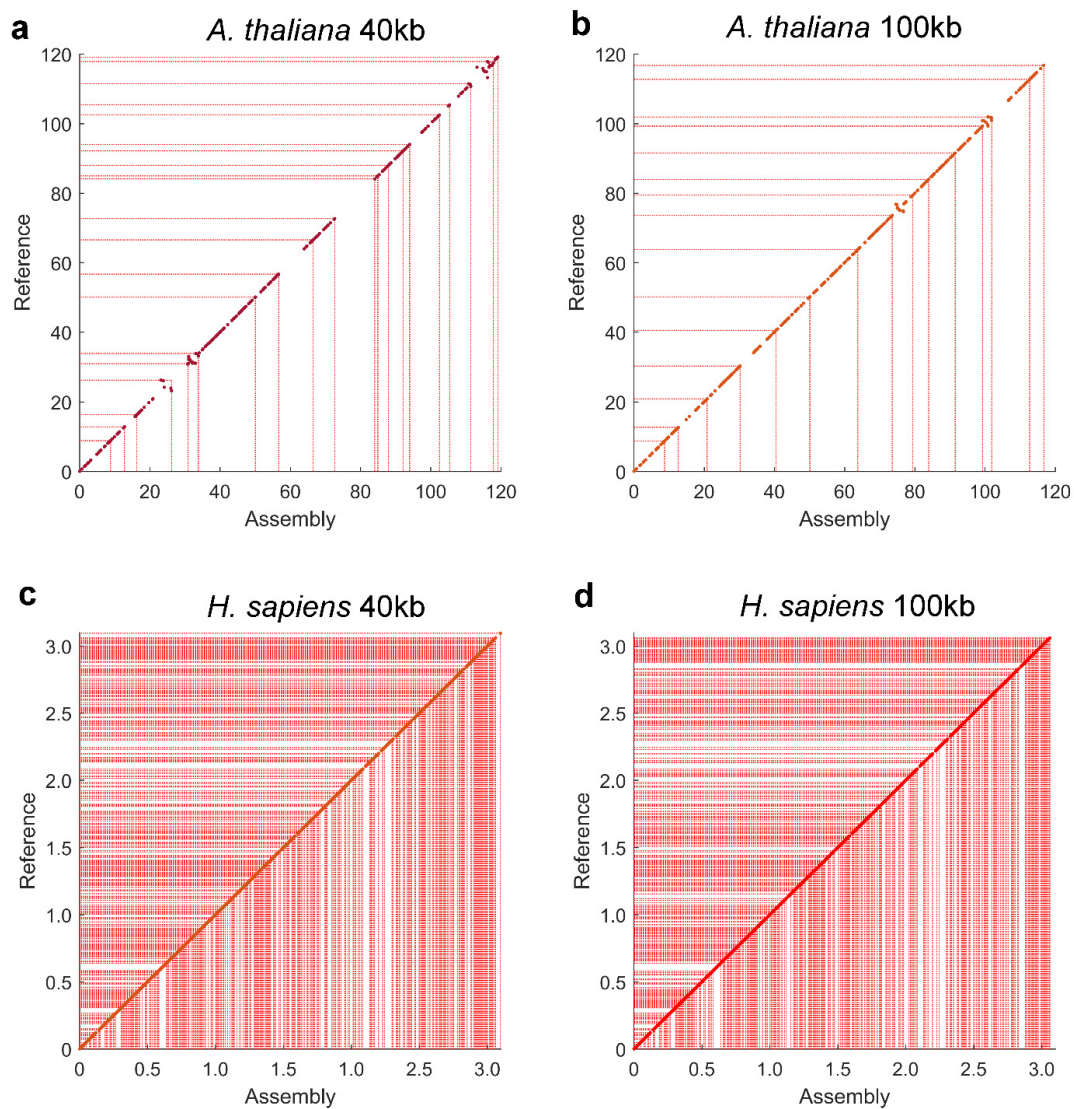

**Figure S1.** Dot-plot comparisons showing that restriction maps generated using simulation datasets are highly consistent with the reference genomes. (a) *A. thaliana* 40kb dataset; (b) *A. thaliana* 100kb dataset; (c) human 40kb dataset; (d) human 100kb dataset. For each assembled map, break points are marked with red lines.

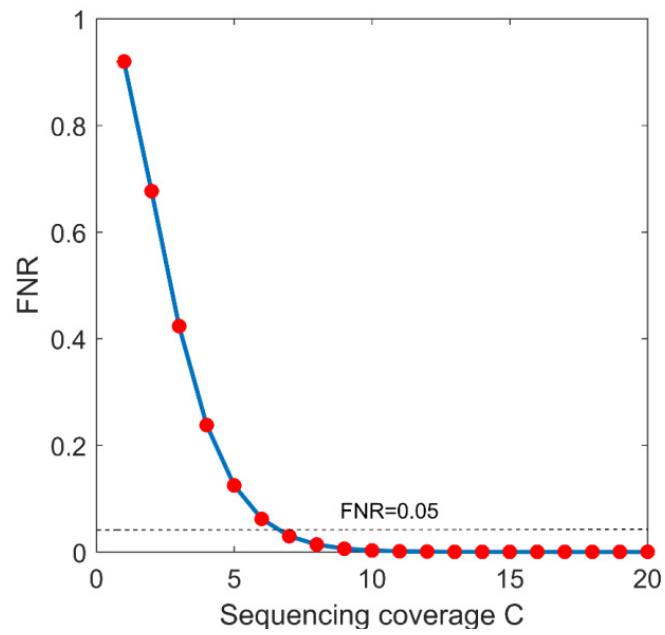

**Figure S2.** The false negative rate (FNR) as the function of average sequencing coverage, showing that the average sequencing coverage of RadMap should theoretically be no less than 7x in order to ensure a low false negative rate (FNR<0.05) of marker genotyping.

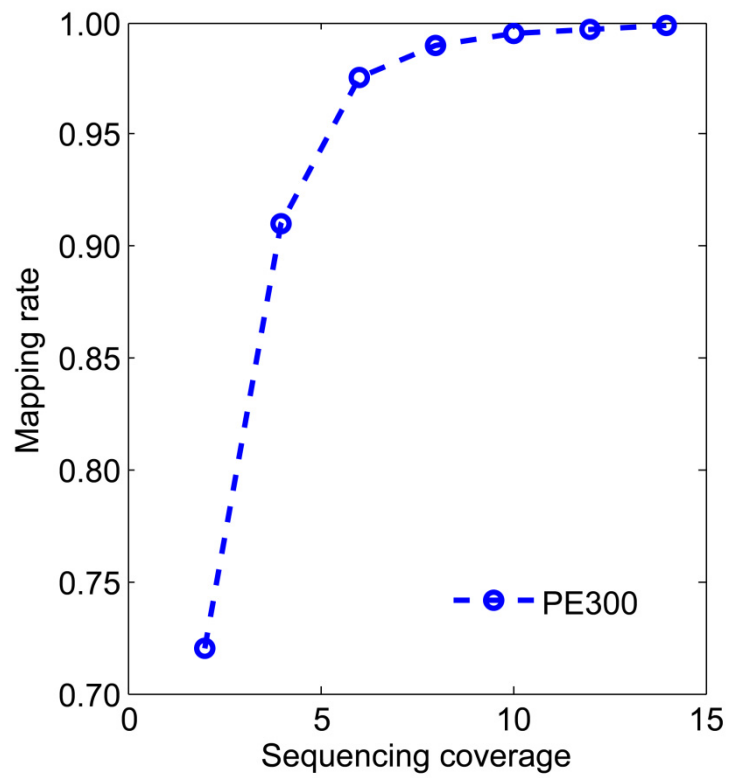

**Figure S3.** The mapping rate of *Bsa*XI tags as a function of WGS sequencing coverage, showing that 10x MiSeq PE300 reads is sufficient to capture nearly all *Bsa*XI tags (99.7%) from the complete genome of *A. thaliana*.

**Table S1.** Overview of the *Bsa*XI tags *in silico* extracted from the genomes of *A. thaliana* and *H. sapiens*.

|                                            | <i>A. thaliana</i> |         | <i>H. sapiens</i> |           |
|--------------------------------------------|--------------------|---------|-------------------|-----------|
|                                            | 40 kb              | 100 kb  | 40 kb             | 100 kb    |
| Clone size                                 | 40 kb              | 100 kb  | 40 kb             | 100 kb    |
| Total number of <i>Bsa</i> XI tags         | 39,678             | 39,678  | 1,165,976         | 1,165,976 |
| Total number of unique tags <sup>a</sup>   | 35,618             | 35,618  | 1,118,736         | 1,118,736 |
| Ave. distance between two unique tags (bp) | 3,344              | 3,344   | 3,041             | 3,041     |
| Max. distance between two unique tags (bp) | 228,876            | 228,876 | 404,226           | 404,226   |
| Min. distance between two unique tags (bp) | 2                  | 2       | 0                 | 0         |
| Standard deviation (bp) of tag distances   | 4,452              | 4,452   | 8,367             | 8,367     |

<sup>a</sup> unique tags refer to those that can map to a unique genomic location.

**Table S2.** Summary of hierarchical restriction mapping for simulation datasets.

|                       | <i>A. thaliana</i>      |                          | <i>H. sapiens</i>       |                          |
|-----------------------|-------------------------|--------------------------|-------------------------|--------------------------|
|                       | No. of groups<br>(40kb) | No. of groups<br>(100kb) | No. of groups<br>(40kb) | No. of groups<br>(100kb) |
| Step1                 | 409                     | 176                      | 1,368                   | 1,314                    |
| Step2                 | 151                     | 80                       | 1,303                   | 1,262                    |
| Step3                 | 75                      | 40                       | 1,074                   | 1,150                    |
| Step4                 | 60                      | 31                       | 975                     | 970                      |
| Step5                 | 49                      | 28                       | 704                     | 690                      |
| Step6                 | 49                      | 27                       | 596                     | 567                      |
| Step7                 | 44                      | 25                       | 534                     | 475                      |
| Step8                 | 42                      | 24                       | 493                     | 418                      |
| Step9                 | 40                      | 20                       | 407                     | 361                      |
| N50 (Mb)              | 4.1                     | 12.7                     | 9.7                     | 11.0                     |
| N90 (Mb)              | 0.8                     | 4.9                      | 2.7                     | 2.8                      |
| Coverage              | 98.4%                   | 98.5%                    | 99.2%                   | 99.4%                    |
| Accuracy <sup>a</sup> | 99.7%                   | 99.9%                    | 99.9%                   | 99.9%                    |

<sup>a</sup> Calculated according to Kendall's statistic.

**Table S3.** Summary of 2b-RAD sequencing of 164 “subhaploid” clone pools in *A. thaliana*.

| Clone Pool ID | No. of reads | Depth<br>(per BsaXI tag) | No. of estimated<br>clones | Haploid<br>genome coverage |
|---------------|--------------|--------------------------|----------------------------|----------------------------|
| 1             | 8,798,940    | 45.81                    | 778                        | 0.25                       |
| 2             | 8,598,616    | 46.40                    | 752                        | 0.25                       |
| 3             | 8,888,729    | 43.89                    | 552                        | 0.17                       |
| 4             | 7,878,066    | 44.34                    | 538                        | 0.16                       |
| 5             | 7,745,652    | 51.31                    | 542                        | 0.16                       |
| 6             | 9,012,666    | 51.12                    | 568                        | 0.17                       |
| 7             | 6,644,057    | 51.01                    | 520                        | 0.15                       |
| 8             | 9,262,581    | 42.74                    | 591                        | 0.18                       |
| 9             | 8,838,650    | 44.50                    | 517                        | 0.15                       |
| 10            | 8,416,638    | 50.28                    | 594                        | 0.17                       |
| 11            | 7,726,545    | 44.01                    | 553                        | 0.17                       |
| 12            | 8,320,462    | 44.20                    | 531                        | 0.16                       |
| 13            | 7,878,340    | 47.23                    | 545                        | 0.15                       |
| 14            | 8,061,126    | 48.85                    | 538                        | 0.17                       |
| 15            | 8,054,874    | 44.97                    | 625                        | 0.19                       |
| 16            | 9,153,445    | 43.54                    | 594                        | 0.18                       |
| 17            | 8,554,666    | 46.97                    | 579                        | 0.17                       |
| 18            | 9,779,217    | 44.20                    | 603                        | 0.19                       |
| 19            | 10,467,344   | 44.36                    | 578                        | 0.18                       |
| 20            | 9,877,001    | 47.10                    | 580                        | 0.18                       |
| 21            | 9,340,311    | 46.17                    | 589                        | 0.18                       |
| 22            | 8,724,105    | 44.53                    | 602                        | 0.17                       |
| 23            | 9,634,225    | 50.85                    | 617                        | 0.18                       |
| 24            | 8,156,842    | 44.57                    | 559                        | 0.17                       |
| 25            | 7,847,942    | 49.81                    | 776                        | 0.24                       |
| 26            | 9,170,107    | 47.69                    | 596                        | 0.19                       |
| 27            | 10,228,036   | 50.08                    | 560                        | 0.17                       |
| 28            | 9,178,701    | 50.51                    | 574                        | 0.17                       |
| 29            | 8,881,887    | 44.71                    | 578                        | 0.17                       |
| 30            | 9,294,126    | 48.76                    | 604                        | 0.18                       |
| 31            | 10,002,171   | 47.68                    | 593                        | 0.18                       |
| 32            | 10,160,853   | 44.56                    | 550                        | 0.17                       |
| 33            | 9,529,320    | 46.27                    | 565                        | 0.17                       |
| 34            | 10,087,763   | 44.56                    | 574                        | 0.18                       |
| 35            | 11,321,672   | 45.07                    | 554                        | 0.17                       |
| 36            | 9,715,208    | 51.03                    | 530                        | 0.16                       |
| 37            | 10,063,069   | 44.48                    | 664                        | 0.19                       |
| 38            | 9,634,494    | 46.57                    | 601                        | 0.18                       |
| 39            | 8,948,585    | 44.03                    | 572                        | 0.16                       |
| 40            | 9,846,109    | 48.56                    | 537                        | 0.17                       |
| 41            | 11,602,099   | 44.06                    | 579                        | 0.17                       |
| 42            | 11,322,493   | 47.48                    | 595                        | 0.18                       |
| 43            | 11,776,939   | 47.74                    | 746                        | 0.25                       |
| 44            | 9,058,792    | 46.69                    | 704                        | 0.25                       |
| 45            | 8,709,648    | 48.46                    | 750                        | 0.27                       |
| 46            | 9,069,226    | 51.65                    | 555                        | 0.17                       |
| 47            | 9,893,385    | 49.71                    | 628                        | 0.19                       |
| 48            | 9,365,082    | 44.53                    | 614                        | 0.19                       |
| 49            | 9,441,565    | 42.80                    | 580                        | 0.18                       |
| 50            | 8,948,328    | 42.86                    | 662                        | 0.22                       |
| 51            | 9,264,343    | 44.32                    | 684                        | 0.21                       |
| 52            | 7,262,044    | 50.64                    | 725                        | 0.22                       |

---

|     |            |       |     |      |
|-----|------------|-------|-----|------|
| 53  | 8,143,980  | 48.42 | 659 | 0.19 |
| 54  | 7,036,271  | 46.19 | 784 | 0.22 |
| 55  | 6,530,909  | 42.42 | 553 | 0.16 |
| 56  | 8,498,443  | 49.46 | 538 | 0.16 |
| 57  | 8,266,795  | 47.61 | 731 | 0.23 |
| 58  | 8,773,181  | 50.79 | 600 | 0.17 |
| 59  | 7,918,517  | 43.63 | 690 | 0.21 |
| 60  | 9,235,838  | 42.92 | 607 | 0.18 |
| 61  | 8,599,452  | 50.58 | 641 | 0.18 |
| 62  | 8,736,217  | 43.86 | 610 | 0.19 |
| 63  | 8,542,532  | 49.67 | 587 | 0.18 |
| 64  | 8,791,722  | 42.83 | 667 | 0.20 |
| 65  | 9,553,228  | 42.54 | 601 | 0.18 |
| 66  | 7,676,836  | 42.80 | 559 | 0.17 |
| 67  | 8,236,655  | 51.24 | 744 | 0.25 |
| 68  | 8,440,741  | 48.68 | 665 | 0.21 |
| 69  | 8,780,652  | 48.75 | 655 | 0.20 |
| 70  | 10,448,499 | 50.76 | 685 | 0.23 |
| 71  | 10,128,486 | 51.34 | 551 | 0.16 |
| 72  | 9,859,292  | 43.69 | 578 | 0.17 |
| 73  | 10,147,356 | 46.10 | 575 | 0.18 |
| 74  | 9,568,286  | 44.13 | 578 | 0.17 |
| 75  | 8,161,269  | 42.96 | 608 | 0.19 |
| 76  | 8,877,768  | 42.89 | 564 | 0.15 |
| 77  | 10,205,035 | 46.34 | 566 | 0.17 |
| 78  | 9,261,948  | 43.92 | 591 | 0.18 |
| 79  | 8,620,603  | 49.89 | 829 | 0.32 |
| 80  | 9,509,822  | 47.48 | 757 | 0.26 |
| 81  | 9,039,585  | 43.14 | 538 | 0.16 |
| 82  | 10,135,141 | 45.09 | 685 | 0.23 |
| 83  | 9,624,074  | 44.29 | 530 | 0.15 |
| 84  | 8,375,640  | 44.77 | 718 | 0.26 |
| 85  | 7,932,895  | 47.03 | 587 | 0.17 |
| 86  | 8,386,775  | 49.28 | 662 | 0.21 |
| 87  | 5,793,920  | 43.86 | 646 | 0.22 |
| 88  | 7,611,486  | 46.79 | 713 | 0.22 |
| 89  | 8,052,909  | 48.83 | 695 | 0.23 |
| 90  | 8,317,600  | 46.31 | 693 | 0.25 |
| 91  | 9,229,832  | 42.85 | 738 | 0.26 |
| 92  | 9,228,943  | 42.48 | 703 | 0.23 |
| 93  | 8,715,776  | 43.72 | 705 | 0.25 |
| 94  | 8,831,001  | 45.74 | 710 | 0.25 |
| 95  | 9,999,178  | 50.39 | 698 | 0.24 |
| 96  | 8,904,443  | 43.33 | 664 | 0.21 |
| 97  | 8,362,104  | 45.86 | 865 | 0.33 |
| 98  | 9,088,621  | 47.26 | 719 | 0.23 |
| 99  | 8,474,315  | 50.42 | 684 | 0.22 |
| 100 | 7,578,404  | 44.29 | 806 | 0.28 |
| 101 | 9,323,251  | 46.62 | 689 | 0.23 |
| 102 | 9,467,590  | 44.92 | 704 | 0.24 |
| 103 | 9,559,497  | 47.79 | 677 | 0.23 |
| 104 | 10,062,353 | 49.21 | 718 | 0.25 |
| 105 | 9,157,928  | 46.20 | 849 | 0.32 |
| 106 | 10,057,412 | 42.64 | 655 | 0.21 |
| 107 | 9,353,350  | 46.38 | 655 | 0.22 |
| 108 | 9,447,200  | 48.09 | 717 | 0.25 |
| 109 | 8,989,967  | 44.12 | 643 | 0.21 |

---

|     |            |       |     |      |
|-----|------------|-------|-----|------|
| 110 | 8,304,319  | 49.81 | 688 | 0.24 |
| 111 | 8,994,787  | 48.89 | 637 | 0.21 |
| 112 | 13,579,917 | 51.21 | 722 | 0.26 |
| 113 | 12,205,953 | 49.42 | 790 | 0.27 |
| 114 | 13,736,878 | 50.19 | 695 | 0.24 |
| 115 | 13,607,838 | 49.41 | 765 | 0.26 |
| 116 | 9,112,926  | 49.04 | 694 | 0.24 |
| 117 | 13,612,130 | 48.62 | 681 | 0.23 |
| 118 | 8,356,257  | 47.94 | 924 | 0.35 |
| 119 | 8,552,146  | 44.49 | 667 | 0.25 |
| 120 | 7,564,509  | 47.77 | 675 | 0.23 |
| 121 | 7,363,811  | 45.86 | 761 | 0.26 |
| 122 | 7,881,337  | 49.13 | 693 | 0.23 |
| 123 | 7,621,375  | 45.32 | 723 | 0.25 |
| 124 | 7,154,029  | 47.95 | 711 | 0.24 |
| 125 | 8,650,434  | 43.72 | 718 | 0.25 |
| 126 | 8,357,194  | 47.37 | 658 | 0.23 |
| 127 | 8,529,860  | 50.23 | 731 | 0.24 |
| 128 | 7,859,845  | 46.83 | 720 | 0.26 |
| 129 | 8,286,040  | 48.25 | 702 | 0.25 |
| 130 | 7,446,962  | 43.43 | 813 | 0.31 |
| 131 | 8,009,365  | 43.25 | 809 | 0.27 |
| 132 | 8,796,193  | 50.76 | 678 | 0.24 |
| 133 | 8,141,142  | 44.16 | 750 | 0.24 |
| 134 | 8,908,351  | 45.77 | 670 | 0.22 |
| 135 | 9,255,335  | 46.51 | 735 | 0.25 |
| 136 | 9,038,673  | 48.82 | 682 | 0.23 |
| 137 | 8,533,837  | 47.89 | 721 | 0.23 |
| 138 | 7,953,903  | 49.83 | 699 | 0.24 |
| 139 | 8,648,765  | 44.71 | 821 | 0.28 |
| 140 | 8,805,351  | 44.09 | 789 | 0.28 |
| 141 | 9,391,814  | 52.30 | 693 | 0.24 |
| 142 | 9,628,395  | 43.21 | 829 | 0.28 |
| 143 | 10,179,407 | 49.93 | 724 | 0.23 |
| 144 | 9,771,412  | 42.80 | 660 | 0.23 |
| 145 | 9,647,385  | 48.88 | 694 | 0.24 |
| 146 | 9,483,989  | 48.33 | 708 | 0.25 |
| 147 | 9,756,173  | 48.68 | 685 | 0.24 |
| 148 | 9,064,523  | 47.58 | 701 | 0.24 |
| 149 | 7,928,423  | 48.52 | 700 | 0.23 |
| 150 | 9,618,805  | 51.48 | 656 | 0.23 |
| 151 | 9,712,825  | 48.41 | 782 | 0.27 |
| 152 | 10,011,232 | 49.68 | 697 | 0.24 |
| 153 | 8,749,287  | 47.74 | 728 | 0.25 |
| 154 | 8,886,614  | 47.01 | 734 | 0.25 |
| 155 | 8,361,511  | 48.18 | 731 | 0.24 |
| 156 | 8,965,584  | 51.67 | 761 | 0.25 |
| 157 | 8,927,606  | 50.22 | 728 | 0.25 |
| 158 | 7,718,804  | 46.49 | 814 | 0.28 |
| 159 | 7,166,751  | 42.76 | 804 | 0.27 |
| 160 | 7,785,611  | 50.41 | 723 | 0.26 |
| 161 | 7,643,381  | 45.90 | 838 | 0.27 |
| 162 | 7,483,375  | 47.33 | 701 | 0.24 |
| 163 | 7,886,703  | 49.52 | 671 | 0.23 |
| 164 | 8,167,231  | 47.39 | 672 | 0.23 |



**Table S4.** Summary of WGS datasets used for *de novo* assembly in this study.

|                       | MiSeq PE300 | PacBio1 | PacBio2 <sup>a</sup> |
|-----------------------|-------------|---------|----------------------|
| Avg. read length (bp) | 300         | 5,479   | 14,711               |
| Total no. of reads    | 10,074,732  | 109,327 | 40,445               |
| Genome coverage       | 25x         | 5x      | 5x                   |

<sup>a</sup> This dataset was retrieved from the website of Pacific Biosciences (<http://www.pacb.com/blog/new-data-release-arabidopsis-assembly/>).

**Table S5.** Summary of WGS assemblies generated using four *de novo* assemblers.

| Dataset     | #Contigs | N50 (kb) | N90 (kb) | Coverage (Mb)  | Software    |
|-------------|----------|----------|----------|----------------|-------------|
| MiSeq PE300 | 4,502    | 54.1     | 12.2     | 115.7 (96.6%)  | Celera      |
|             | 12,247   | 24.5     | 4.3      | 107.3 (90.2%)  | SOAPdenovo2 |
|             | 16,157   | 16.3     | 3.2      | 111.1 (93.3%)  | ABYSS       |
|             | 67,752   | 37.2     | 0.5      | 164.5 (138.2%) | SPAdes      |
